# Supplementary material
Source: MDPI journal article supplement (https://www.mdpi.com/2311-5629/4/3/38)
Supplement: s1 [file s1]

## Supporting Information

# High Surface Area Mesoporous Activated Carbon from Hemp Bast Fibre Using Hydrothermal Processing

Md Zakir Hossain, Wei Wu, William Z. Xu, Muhammad B.I. Chowdhury, Anil Kumar Jhawar, Devin Machin, Paul A Charpentier

<sup>1</sup> Department of Chemical and Biochemical Engineering, The University of Western Ontario, London, Ontario, Canada N6A 5B9

\* Correspondence: pcharpentier@eng.uwo.ca; Tel.: 1-(519)-661-3466

**Table S1.** BET surface area of some commercial products.

| Name of the sample                                                 | BET surface area obtained using Tristar II 3020 (m <sup>2</sup> /g) | BET surface area obtained from the product supplier (m <sup>2</sup> /g) |
|--------------------------------------------------------------------|---------------------------------------------------------------------|-------------------------------------------------------------------------|
| Silica-alumina pellets                                             | 211                                                                 | 215                                                                     |
| Powdered activated carbon (DARCO G-60, 100–325 mesh particle size) | 598                                                                 | 600                                                                     |
| Activated carbon, Norit Row 0.8mm pellets, steam activated         | 1193                                                                | 1212                                                                    |
| Basolite® C300                                                     | 1998                                                                | 1500 - 2100                                                             |

Table shows that the accuracy of the results obtained by Tristar II 3020 is > 98%.
